# Supplementary material
Source: Elsevier journal article supplement (https://www.sciencedirect.com/science/article/pii/S2341287923000194)
Supplement: mmc1 [file S2341287923000194:mmc1.pdf]

# PROTOCOLO DE SECUENCIA RÁPIDA DE INTUBACIÓN

## CONCEPTO E INDICACIONES

La secuencia rápida de intubación (SRI) es un proceso secuencial para conseguir una sedación y parálisis óptimas que permita realizar una intubación urgente de forma adecuada, en el menor tiempo posible, minimizando los efectos adversos y el riesgo de broncoaspiración e hipoxia.

No se debe aplicar la SRI en una parada cardiorrespiratoria o coma profundo (escala de Glasgow = 3) y hay que tener especial cuidado ante una vía aérea difícil o inestabilidad hemodinámica no resuelta.

## PASOS

1. Planificación y preparación.
2. Preoxigenación.
3. Premedicación.
4. Sedación con relajación muscular.
5. Ventilación previa.
6. Protección y posición del paciente.
7. Intubación.
8. Comprobación del tubo endotraqueal.

## 1. PLANIFICACIÓN Y PREPARACIÓN DEL PACIENTE PARA LA INTUBACIÓN

- **Breve historia clínica y exploración física.**

Tras la decisión de intubación hay que realizar:

- Revisar en la historia los factores de riesgo de intubación complicada (malformaciones craneofaciales y de vías respiratorias, antecedentes de asma, estridor, complicaciones con intubaciones previas, alergias a fármacos utilizados en la inducción, déficit de acetilcolinesterasa).
- Valorar si está con alimentación enteral y pararla, o averiguar cuándo ha sido la última comida.
- Rápida exploración física para detectar circunstancias anatómicas que puedan dificultar la ventilación e intubación como malformaciones faciales, retrognatía, macroglosia, boca pequeña, cuello corto o con movilidad limitada, obesidad, etc.

- **Prescripción médica: pautar la medicación de intubación.**

Revisión de la medicación programada en la hoja de prescripción por los médicos responsables.

- **Calibrar y programar el respirador y las alarmas en el monitor.**

Lo calibran las enfermeras y lo programan los médicos.

- **Monitorización:** FC, TA, ECG continuo, pulsioximetría y capnografía.
- **Preparar el equipo necesario para la intubación.**

No iniciar nunca la SRI sin tener al paciente adecuadamente monitorizado y todo el material necesario disponible.

Personal responsable de manejar al paciente, **5 personas** salvo excepciones:

- Médico adjunto responsable.
- Médico residente.
- Enfermera responsable.
- Enfermera ayudante.
- Auxiliar responsable.

#### **Actuación del personal médico**

- Realizar una evaluación previa (de corta duración): estado de conciencia, FC, ritmo ECG, TA, saturación y expansión torácica.
- Calcular o revisar la medicación de intubación.
- Programar la ventilación mecánica y las alarmas del respirador.
- Realizar la técnica de intubación.
- Comprobar las constantes vitales durante y tras la intubación.
- Comprobar la correcta posición del tubo endotraqueal y la ventilación tras la intubación.
- Solicitar una Rx de tórax de control.

#### **Actuación del personal de enfermería**

##### **Enfermera responsable:**

- Preparar la monitorización del paciente.
  - ECG.
  - Pulsioxímetro.
  - Manguito para medición de presión arterial.
  - Capnógrafo con módulo activado en el monitor.
- Comprobar el acceso venoso previo a la intubación.
- Administrar la medicación de intubación.
- Comprobar las constantes vitales durante y tras la intubación.
- Fijar el tubo endotraqueal.

### **Enfermera ayudante:**

- Comprobar el material de la mesa (bandeja superior del carro de VA) y del puesto.
- Calibrar el respirador.
- Dar el material de aspiración y el material de intubación al médico.
- Capnografía.
- Conexión a VM.

### **Actuación del personal auxiliar de enfermería.**

- Verificar el funcionamiento de la bolsa de ventilación.
- Comprobar que el tamaño de la mascarilla facial es adecuado para el paciente.  
Dejar la mascarilla en su lugar dentro de la bolsa pero sin anudar.
- Traer el carro de VA y preparar el material necesario.
- Proporcionar al médico y enfermera el material que soliciten.
- Traer el carro de parada en caso de que sea necesario.
- Ayudar en la fijación del tubo endotraqueal.
- Recoger y colocar el material sobrante tras la técnica.

### **Equipo:**

#### **a) En la bandeja superior del carro de vía aérea:**

- Tubo endotraqueal. Se prepararán 2 TET del número indicado y otro de un número inferior, con o sin balón.
- Mango y pala de laringoscopio según la edad. Comprobar que funciona la luz.
- Fiador de tamaño adecuado (neonatal, pediátrico o de adulto)
- Pinza de Magill (pequeña, mediana o grande según el tamaño del niño).
- Cánula orofaríngea (Guedel) de tamaño adecuado para el niño.
- Lubricante para el TET tipo "Silcospray".
- Jeringa de 5 ml para comprobar el balón del tubo.
- Si se sospecha intubación difícil: material de de vía aérea difícil (ver protocolo).
- Airtraq (según tamaño de TET):

| Indicación               | Color         | Mínima apertura bucal |
|--------------------------|---------------|-----------------------|
| Neonatal- Lactante nasal | <b>Blanco</b> | -                     |
| TET 2,5 a 3,5            | <b>Gris</b>   | 12,5 mm               |
| TET 4-5,5                | <b>Morado</b> | 12,5 mm               |
| TET 6-7,5                | <b>Verde</b>  | 16 mm                 |
| TET 7-8,5                | <b>Azul</b>   | 18 mm                 |

- Mascarilla laríngea (Auragain<sup>R</sup>).

| Tamaño               | 1    | 1 <sup>1/2</sup> | 2     | 2 <sup>1/2</sup> | 3     | 4     |
|----------------------|------|------------------|-------|------------------|-------|-------|
| Peso (kg)            | < 5  | 5-10             | 10-20 | 20-30            | 30-50 | 50-70 |
| Máximo TET           | 3,5  | 4                | 5     | 5,5              | 6,5   | 7,5   |
| Máximo tubo gástrico | 6 FR | 8 FR             | 10 FR | 10 FR            | 16 FR | 16 FR |

- Guías de intubación.
- Intercambiadores de TET.
- Fibrobroncoscopio localizado.
- Equipo de cricotiroidotomía.

**b) En el puesto:**

- Pulsioxímetro.
- Capnógrafo con línea de muestreo de CO<sub>2</sub> y módulo activado en el monitor.
- Medicación de intubación: se tendrá cargada y preparada previamente.
- Fonendoscopio.
- Protecciones para la piel y fijación del tubo.
- Esparadrapo para la fijación del tubo endotraqueal.
- Bolsa de ventilación y mascarilla facial adecuada al tamaño del paciente.  
Mascarilla con reservorio si precisa.
- Fuente de oxígeno y tubo de conexión a la bolsa de ventilación.
- Sondas de aspiración con control.
- Aparato de aspiración o vacío con manómetro de presión. Goma de conexión entre la sondas de aspiración y el sistema de vacío
- Respirador con tubuladura adecuada al tamaño del niño.
- Manómetro de presión para inflar el balón y mantener la presión.
- Intercambiador de calor/humedad (nariz) del tamaño adecuado.

**Tabla I. Material de intubación.**

| EDAD                               | Prematuro                      | < 6<br>meses                          | 6-12<br>meses                                 | 1-2<br>años                | 2-5<br>años  | 5-8<br>años  | > 8<br>años                               |
|------------------------------------|--------------------------------|---------------------------------------|-----------------------------------------------|----------------------------|--------------|--------------|-------------------------------------------|
| Mascarilla<br>facial               | Redonda<br>Modelo<br>prematuro | Redonda<br>Modelo<br>Recién<br>nacido | Triangular<br>o redonda<br>Modelo<br>lactante | Triangular<br>Modelo niños |              |              | Triangular<br>Modelo<br>adulto<br>pequeño |
| Bolsa auto-<br>inflable            | 250 ml                         | 500 ml                                |                                               |                            | 1600-2000 ml |              |                                           |
| Cánula<br>orofaríngea              | 00                             | 0                                     | 1                                             | 2                          | 3            | 4            | 4-5                                       |
| Sonda de<br>aspiración<br>traqueal | 6                              | 6-8                                   | 8-10                                          |                            | 10-12        | 12-14        |                                           |
| Laringoscopio                      | Pala recta                     | Pala recta o curva                    |                                               | Pala curva                 |              |              |                                           |
|                                    | Nº 0                           | Nº 1                                  |                                               | Nº 1-2                     | Nº 2         | Nº 2-3       |                                           |
| Nº de tubo<br>sin balón *          | 2-3                            | 3,5-4                                 | 4                                             | 4-4,5                      | 4+Edad<br>/4 | 4+Edad/<br>4 | 4+Edad/4                                  |

Tubo con balón: 0,5 menor que sin balón

## 2. PREOXIGENACIÓN

La preoxigenación consiste en la aplicación de oxígeno mediante mascarilla reservorio ( $\text{FiO}_2$  de 1) durante 3-5 minutos que se mantiene hasta la intubación. Debe realizarse simultáneamente con la fase de planificación-preparación.

Si el paciente recibe ventilación no invasiva puede realizarse la preoxigenación con este dispositivo o con oxigenoterapia de alto flujo con  $\text{FiO}_2$  de 1.

La preoxigenación es especialmente importante en niños, porque tienen un mayor consumo de oxígeno y una menor capacidad residual funcional, con peor tolerancia a la apnea y una desaturación rápida tras la sedación y relajación. Una preoxigenación adecuada retrasará unos minutos la aparición de hipoxemia en apnea.

## 3. PREMEDICACIÓN

Evita la aparición de alguno de los efectos secundarios de la intubación.

La administrará la enfermera responsable del paciente 1-2 minutos antes de la inducción.

### ▪ ATROPINA:

- Efectos: evita la bradicardia por el estímulo vagal que produce la intubación que es mayor en niños pequeños y en los que reciben succinilcolina. También disminuye la salivación, aunque su efecto no es inmediato.
- Indicaciones:
  - Niños menores de un año.
  - Administración de succinilcolina o ketamina.
  - Presencia de bradicardia o antecedentes de bradicardia con procedimientos previos.
- Contraindicaciones: taquicardia grave.
- Efectos: hay que tener en cuenta que su efecto sobre la FC puede durar varias horas y que produce midriasis arreactiva que puede interferir en la evaluación neurológica.
- Dosis: 0,02 mg/kg (mínimo 0,1 mg; máximo 1 mg).

### ▪ LIDOCAÍNA:

- Efecto: inhibe el reflejo de la tos y de vómito y mejora la perfusión cerebral.
- Indicación: si sospecha de hipertensión intracraneal.
- Dosis: 1 -1,5 mg/kg.

### ▪ FENTANILO:

- Efecto: atenúa el reflejo simpático (taquicardia, hipertensión) producido por el laringoscopio y tiene efecto analgésico.
- Indicaciones: en toda intubación. Puede no utilizarse si se administra ketamina.
- Dosis: 1-2 mcg/kg.

#### **4. INDUCCIÓN CON SEDACIÓN Y RELAJACIÓN MUSCULAR**

Se administrará por la enfermera responsable del paciente.

##### **Sedación**

El sedante ideal es el que tenga un inicio de acción rápido, con corta duración y con los menores efectos adversos. Para su elección hay que tener en cuenta si el paciente presenta inestabilidad hemodinámica, alteraciones neurológicas, sepsis o broncoespasmo.

- **ETOMIDATO:**
  - Efecto: no produce compromiso hemodinámico.
  - Contraindicaciones: no utilizar si sospecha de sepsis (produce supresión adrenocortical).
  - Dosis: 0,2-0,3 mg/kg.
- **KETAMINA:**
  - Efecto: produce sedación, amnesia y analgesia, aumenta la FC y la TA y produce broncodilatación, y no aumenta la presión intracraneal.
  - Dosis: 2 mg/kg.
- **PROPOFOL:**
  - Efectos: es neuroprotector aunque este efecto puede estar limitado si hay disminución de la presión de perfusión por hipotensión.
  - Contraindicaciones: no está indicado en inestabilidad hemodinámica al producir vasodilatación y depresión miocárdica.
  - Dosis: 2-3 mg/kg.
- **TIOFENTAL:**
  - Efectos: es neuroprotector y presenta propiedades anticonvulsivantes.
  - Contraindicación: pacientes hemodinámicamente inestables porque produce vasodilatación y depresión miocárdica.
  - Dosis: 3-5 mg/kg.
- **MIDAZOLAM:**
  - Efectos: duración de efecto algo mayor que los anteriores. Efectos hemodinámicos moderados.
  - Dosis: 0,2-0,3 mg/kg.

##### **Relajación**

- **SUCCINILCOLINA:**
  - Efectos: inicio rápido y poco duradero (3-5 minutos). Efectos adversos importantes como bradicardia y asistolia (evitable mediante atropina), hiperpotasemia, fasciculaciones y elevación de la presión intracraneal.

- Contraindicaciones: no usar en déficit de acetilcolinesterasa, hipertemia maligna politraumatismo, grandes quemados, insuficiencia renal, ni enfermedades neuromusculares.
- Dosis: 1-2 mg/kg.
- **ROCURONIO:**
  - Efectos: menos efectos secundarios que la succinilcolina, pero tiene un inicio más tardío y una duración más larga (30-40 minutos). Puede revertirse su acción paralizante con Sugammadex, (dosis 2-4 mg/kg).
  - Dosis: 0,6-1 mg/kg.

### **Esquema medicación general de intubación:**

**Por este orden**

**ATROPINA** (0,02 mg/kg)  
**+ FENTANILO** (1 mcg/kg)  
**+ ETOMIDATO** (0,2 - 0,3 mg/kg)  
**+ SUCCINILCOLINA** (1 mg/kg)

*(Administrar fármacos en bolo rápido y lavar posteriormente).*

### **Situaciones especiales:**

| <b>Paciente</b>    | <b>Sedante</b>                 | <b>Relajante</b> |
|--------------------|--------------------------------|------------------|
| Hipotensión        | Etomidato, Ketamina            | Rocuronio        |
| Estatus asmático   | Ketamina, Midazolam, Propofol  | Rocuronio        |
| Estatus convulsivo | Tiopental, Midazolam, Propofol | Rocuronio        |
| HT intracraneal    | Tiopental, Midazolam, Propofol | Rocuronio        |
| Sepsis             | No utilizar etomidato.         | Succinilcolina   |
| Politraumatismo    | Etomidato, Midazolam, Propofol | Rocuronio        |



**Tabla II. Medicación de intubación.**

| MEDICACIÓN         | AMPOLLA                     |
|--------------------|-----------------------------|
| <b>ATROPINA</b>    | 1 mg/ml Amp: 1 mg/1 ml      |
| <b>MIDAZOLAM</b>   | 5 mg/ml Amp: 15 mg/3 ml     |
| <b>FENTANIL</b>    | 50 mcg/ml Amp: 150 mcg/3 ml |
| <b>ETOMIDATO</b>   | 2 mg/ml Amp: 20 mg/10 ml    |
| <b>PROPOFOL 1%</b> | 10 mg/ml Amp: 20-50-100 ml  |
| <b>2%</b>          | 20 mg/ml                    |
| <b>KETAMINA</b>    | 50 mg/ml Vial: 500 mg/10 ml |
| <b>TIOPENTAL</b>   | 50 mg/ml Vial: 10 y 20 ml   |
| <b>SUXAMETONIO</b> | 50 mg/ml Amp: 100 mg/2 ml   |
| <b>ROCURONIO</b>   | 10 mg/ml Vial: 5 y 10 ml    |
| <b>SUGAMMADEX</b>  | 100 mg/ml Amp: 200 y 500 mg |

## 5. VENTILACIÓN

- Después de la administración de los fármacos, si el niño tiene una buena saturación, se debe realizar la intubación directamente.
- Si no se ha hecho preoxigenación o el niño no ha logrado con ésta una oxigenación adecuada será necesario ventilar con mascarilla y bolsa con flujos de oxígeno elevados (15 L/min).

El riesgo de la ventilación manual es el aumento de la presión gástrica y la posibilidad de regurgitación y/o vómitos. Debe realizarse con volúmenes corrientes bajos y flujos de oxígeno altos, valorando la realización concomitante de presión cricoidea suave (Sellick) para evitar la distensión gástrica y disminuir el riesgo de aspiración.

## 6. POSICIÓN DEL PACIENTE Y PROTECCIÓN DE LA VÍA AÉREA

- Posición: el paciente deberá estar en una posición que favorezca la intubación, con los ejes oral, faríngeo y laríngeo alineados. Para ello, se le deberá colocar en posición de "olfateo". Para conseguirlo puede ser necesario únicamente la hiperextensión cervical, o el uso de rodetes debajo de los hombros y/o apoyos cervicales.
- Maniobra de Sellick: presión sobre el cartílago cricoides para desplazar la glotis hacia atrás y ocluir la luz del esófago. Esta maniobra está indicada cuando no se visualiza bien la glotis y para disminuir el paso de aire al estómago y su distensión, lo que disminuye la posibilidad de aspiración por regurgitación gástrica. Sin embargo, en algunos casos también puede dificultar la intubación por lo que debe

suspenderse si con ella no se visualiza bien la glotis. Se suele comenzar tras la administración del relajante muscular.

## **7. INTUBACIÓN**

- Momento: tras comprobarse que el relajante muscular ha hecho efecto, unos 45 segundos aproximadamente.
- Vía: oral o nasal según indicación médica.
- Valorar maniobras que faciliten visualización de la glotis como maniobra de Sellick o maniobra 'BURP' (*Backward, Upward, Rightward Pressure*): desplazamiento de la laringe hacia atrás, arriba y a la derecha, con lo que se mejora la visualización de las estructuras laríngeas y las condiciones para la intubación.
- Si fracasa el primer intento, definido principalmente como aparición de desaturación significativa ( $> 20\%$  respecto a la basal) y/o no conseguir la intubación en aproximadamente 30 a 45 segundos tras introducir laringoscopio: ventilación con mascarilla y bolsa de ventilación con O<sub>2</sub> y preparar material de intubación difícil (carro de VAD).

## **8. CONTROLES TRAS LA INTUBACIÓN. COMPROBACIÓN DEL TUBO ENDOTRAQUEAL Y EL ESTADO TRAS LA INTUBACIÓN**

- Comprobación de intubación: para valorar si el paciente está bien intubado hay que comprobar la expansión torácica, auscultar en ambos campos pulmonares a nivel de las axilas, valorar la SatO<sub>2</sub>, comprobar si el tubo endotraqueal se empaña y comprobar la capnografía (el mejor método). Posteriormente se comprobará su posición radiológicamente.
- Fijación del tubo endotraqueal: es muy importante una adecuada fijación del TET. Hay que comprobar la ventilación con los cambios de postura de la cabeza del paciente (flexión, extensión o lateral) y si se le colocan almohadas o rodillos.
- Controles posteriores: tras la fijación se comprobará nuevamente la auscultación, saturación, capnografía, parámetros del respirador, se valorará la necesidad de gasometría y se solicitará una Rx de tórax.

## ALGORITMO DE LA SECUENCIA RÁPIDA DE INTUBACIÓN

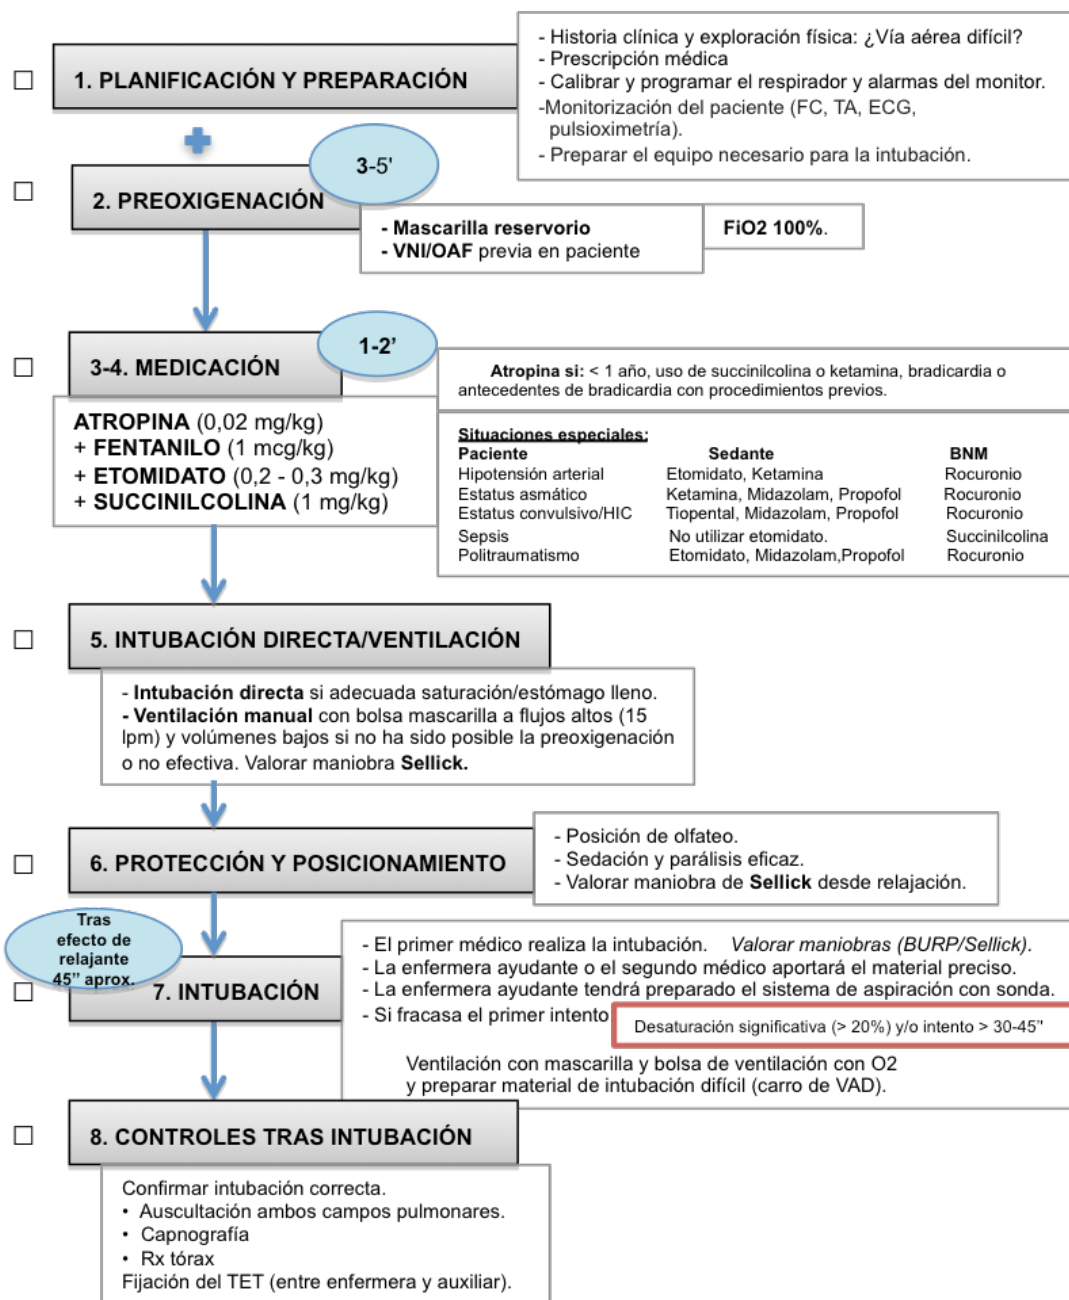

**HOJA DE VERIFICACIÓN DE INTUBACIÓN****fecha:****Médicos:****Enfermeras:****TCAE:**

| <b>1. Preparación del MATERIAL</b> 1 médico y 1 enfermera o TCAE                                                                                                                                                                                                   | <b>Marcar con X</b> |
|--------------------------------------------------------------------------------------------------------------------------------------------------------------------------------------------------------------------------------------------------------------------|---------------------|
| Material <b>mesa</b> de intubación Preparado por A1/E2                                                                                                                                                                                                             |                     |
| Material del <b>puesto</b> de intubación por E1                                                                                                                                                                                                                    |                     |
| Elegir <b>laringoscopio</b> convencional o videolaringoscopio.                                                                                                                                                                                                     |                     |
| <b>Calibrar y programar</b> Respirador                                                                                                                                                                                                                             |                     |
| <b>Preparación de fármacos:</b> Fármacos de intubación.                                                                                                                                                                                                            |                     |
| Valorar preparar adrenalina y expansores                                                                                                                                                                                                                           |                     |
| Preparar bolos de sedación                                                                                                                                                                                                                                         |                     |
| <b>2. Preparación del PACIENTE</b> 2 médicos                                                                                                                                                                                                                       |                     |
| <b>Acceso intravenoso.</b>                                                                                                                                                                                                                                         |                     |
| <b>Optimizar posición:</b> tumbado o semiincorporado                                                                                                                                                                                                               |                     |
| <b>Evaluación de la vía aérea.</b> Escala de dificultad de intubación: Mallampati III o IV, SAOS, Movilidad cervical reducida, Coma Hipoxemia grave (Sat<90%), Bajo gasto, Complicaciones en intubaciones previas                                                  |                     |
| <b>Preoxigenación:</b> 3-5 min, Considerar VNI/OAF/O2, Optimizar condiciones del paciente: TA, SatO2, FC                                                                                                                                                           |                     |
| <b>3. Preparación del EQUIPO</b> todos                                                                                                                                                                                                                             |                     |
| <b>Asignar papeles: 6 personas:</b> Líder del equipo ( <b>M1</b> ); Primer intubador ( <b>M2</b> ) resi/adjunto; Segundo intubador ( <b>M3</b> ): adjunto; Medicación (enfermera <b>E1</b> ); Material intub/aspiración (enfermera <b>E2</b> ); Circulante (TCAE). |                     |
| <b>Entrenamiento previo con maniquí</b> residente y adjuntos M2, M3                                                                                                                                                                                                |                     |
| <b>Decidir quien pide ayuda</b>                                                                                                                                                                                                                                    |                     |
| <b>4. Intubación</b>                                                                                                                                                                                                                                               |                     |
| <b>intubación directa</b> si posible <b>o Ventilación manual</b> adecuada si no posible                                                                                                                                                                            |                     |
| Comprobar sedación/parálisis eficaz                                                                                                                                                                                                                                |                     |
| Comprobar correcta intubación                                                                                                                                                                                                                                      |                     |
| <b>Fijación del TET</b>                                                                                                                                                                                                                                            |                     |

## BIBLIOGRAFÍA

- Sagarin MJ, Chiang V, Sakles JC, et al. Rapid sequence intubation for pediatric emergency airway management. *Pediatr Emerg Care* 2002; 18:417.
- Kerrey BT, Mittiga MR, Rinderknecht AS, Varadarajan KR, Dyas JR, Geis GL, Luria JW, Frey ME, Jablonski TE, Iyer SB. Reducing the incidence of oxyhaemoglobin desaturation during rapid sequence intubation in a paediatric emergency department. *BMJ Qual Saf.* 2015;24(11):709-17.
- Mokhateb-Rafii T, Bakar A, Gangadharan S, Gradidge EA, Tellez D, Ruppe M, Tallent S, Bird G, Lavin N, Lee A, Napolitano N, Nadkarni V, Shults J, Nishisaki A; National Emergency Airway Registry for Children (NEAR4KIDS) and Pediatric Acute Lung Injury and Sepsis Investigators (PALISI). Hemodynamic Impact of Oxygen Desaturation During Tracheal Intubation Among Critically Ill Children With Cyanotic and Noncyanotic Heart Disease. *Pediatr Crit Care Med.* 2019;20(1):19-26.
- Neuhaus D, Schmitz A, Gerber A, Weiss M. Controlled rapid sequence induction and intubation - an analysis of 1001 children. *Paediatr Anaesth.* 2013;23(8):734-40.
- Sukys GA, Schvartsman C, Reis AG. Evaluation of rapid sequence intubation in the pediatric emergency department. *J Pediatr (Rio J).* 2011;87(4):343-9.
- Fastle RK, Roback MG. Pediatric rapid sequence intubation: incidence of reflex bradycardia and effects of pretreatment with atropine. *Pediatr Emerg Care* 2004; 20:651.
- Fleming B, McCollough M, Henderson HO. Myth: Atropine should be administered before succinylcholine for neonatal and pediatric intubation. *CJEM* 2005; 7:114.
- Ballow SL, Kaups KL, Anderson S, Chang M.A standardized rapid sequence intubation protocol facilitates airway management in critically injured patients. *J Trauma Acute Care Surg.* 2012;73(6):1401-5.
- McCloskey JJ, Schwartz JM, Shaffner DH. When Is it Best to "BURP"? *Pediatr Crit Care Med.* 2018;19(2):162-163.
- Brewster DJ, Butt W. Tracheal Intubation in PICU: Making It Safe. *Pediatr Crit Care Med.* 2019;20(1):79-81.
